# Supplementary material for: Winter Air Pollution and Genotoxic Effects in Children Living in a Highly Polluted Urban Area
Source: MDPI journal article supplement (doi:10.3390/atmos12091191), 2021-09-15
Supplement: s1 [file s1]

## Supplementary Materials:

Claudia Zani <sup>1,\*</sup>, Elisabetta Ceretti <sup>1</sup>, Donatella Feretti <sup>1</sup>, Milena Villarini <sup>2</sup>, Massimo Moretti <sup>2</sup>, Marco Verani <sup>3</sup>, Antonella De Donno <sup>4</sup>, Sara Bonetta <sup>5</sup>, Annamaria Buschini <sup>6</sup>, Alberto Bonetti <sup>7</sup>, Silvia Bonizzoni <sup>8</sup>, Umberto Gelatti <sup>1</sup> and On behalf of the MAPEC-LIFE Study Group <sup>†</sup>

**Table S1.** Analysis of the associations between MN frequency and PM<sub>10</sub>, PM<sub>2.5</sub>, benzene, NO<sub>2</sub>, SO<sub>2</sub>, CO and O<sub>3</sub> measured in Brescia at various lag time between exposure measure and biological sampling.

| Air pollutants                | IRR  | 95% Cis   | p value |
|-------------------------------|------|-----------|---------|
| PM <sub>10</sub> _1 day       | 0.99 | 0.98-1.0  | 0.15    |
| PM <sub>10</sub> _2 day       | 0.99 | 0.98-1.0  | 0.10    |
| PM <sub>10</sub> _7 day       | 0.99 | 0.98-1.0  | 0.16    |
| PM <sub>10</sub> _14 day      | 0.99 | 0.97-1.0  | 0.34    |
| PM <sub>10</sub> _21 day      | 1.0  | 0.98-1.02 | 0.55    |
| Peak PM <sub>10</sub> _7 day  | 0.99 | 0.98-1.0  | 0.03    |
| PM <sub>2.5</sub> _1 day      | 0.99 | 0.98-1.0  | 0.18    |
| PM <sub>2.5</sub> _2 day      | 0.99 | 0.98-1.0  | 0.13    |
| PM <sub>2.5</sub> _7 day      | 0.99 | 0.98-1.0  | 0.19    |
| PM <sub>2.5</sub> _14 day     | 0.99 | 0.98-1.0  | 0.34    |
| PM <sub>2.5</sub> _21 day     | 1.0  | 0.98-1.02 | 0.55    |
| Peak PM <sub>2.5</sub> _7 day | 0.99 | 0.98-1.0  | 0.06    |
| Benzene_1 day                 | 0.92 | 0.74-1.14 | 0.5     |
| Benzene_2 day                 | 0.85 | 0.66-1.1  | 0.2     |
| Benzene_7 day                 | 0.88 | 0.67-1.16 | 0.3     |
| Benzene_14 day                | 0.96 | 0.71-1.3  | 0.8     |
| Benzene_21 day                | 1.14 | 0.78-1.6  | 0.4     |
| Peak Benzene_7 day            | 0.92 | 0.79-1.1  | 0.3     |
| NO <sub>2</sub> _1 day        | 0.99 | 0.98-1.0  | 0.9     |
| NO <sub>2</sub> _2 day        | 0.99 | 0.98-1.0  | 0.5     |
| NO <sub>2</sub> _7 day        | 0.98 | 0.96-1.0  | 0.3     |
| NO <sub>2</sub> _14 day       | 0.98 | 0.95-1.0  | 0.2     |
| NO <sub>2</sub> _21 day       | 0.99 | 0.96-1.0  | 0.6     |
| Peak NO <sub>2</sub> _7 day   | 1.0  | 0.99-1.0  | 0.5     |
| SO <sub>2</sub> _1 day        | 0.99 | 0.95-1.1  | 0.9     |
| SO <sub>2</sub> _2 day        | 0.98 | 0.93-1.0  | 0.6     |
| SO <sub>2</sub> _7 day        | 1.05 | 0.95-1.15 | 0.3     |
| SO <sub>2</sub> _14 day       | 1.18 | 0.93-1.5  | 0.2     |
| SO <sub>2</sub> _21 day       | 0.98 | 0.80-1.21 | 0.8     |
| Peak SO <sub>2</sub> _7 day   | 0.99 | 0.97-1.0  | 0.9     |

|                            |      |           |      |
|----------------------------|------|-----------|------|
| CO_1 day                   | 0.73 | 0.44-1.2  | 0.2  |
| CO_2 day                   | 0.7  | 0.42-1.1  | 0.1  |
| CO_7 day                   | 0.8  | 0.46-1.3  | 0.4  |
| CO_14 day                  | 0.91 | 0.50-1.6  | 0.7  |
| CO_21 day                  | 1.27 | 0.54-2.9  | 0.5  |
| Peak CO_7 day              | 0.9  | 0.68-1.15 | 0.4  |
| O <sub>3</sub> _1 day      | 1.0  | 0.99-1.02 | 0.4  |
| O <sub>3</sub> _2 day      | 1.0  | 0.99-1.03 | 0.09 |
| O <sub>3</sub> _7 day      | 1.0  | 0.99-1.04 | 0.1  |
| O <sub>3</sub> _14 day     | 1.0  | 0.99-1.05 | 0.1  |
| O <sub>3</sub> _21 day     | 1.0  | 0.99-1.1  | 0.1  |
| Peak O <sub>3</sub> _7 day | 1.0  | 0.99-1.01 | 0.2  |

All the associations were assessed including season, temperature, child BMI and adherence to Mediterranean diet, exposure to secondhand smoke at home, having Italian parents, having graduated mother and father in the model as potential confounders.

**Table S2.** Analysis of the associations between DNA damage with comet test and PM<sub>10</sub>, PM<sub>2.5</sub>, benzene, NO<sub>2</sub>, SO<sub>2</sub>, CO and O<sub>3</sub> measured in Brescia at various lag time between exposure measure and biological sampling.

| <b>Air pollutants</b>     | <b>Coeff.</b> | <b>95% Cis</b> | <b>p value</b> |
|---------------------------|---------------|----------------|----------------|
| PM <sub>10</sub> _1 day   | -0.0002       | -0.002; 0.002  | 0.80           |
| PM <sub>10</sub> _2 day   | -0.001        | -0.004; 0.001  | 0.25           |
| PM <sub>10</sub> _7 day   | -0.002        | -0.006; 0.002  | 0.30           |
| PM <sub>10</sub> _14 day  | 0.0002        | -0.006; 0.006  | 0.95           |
| PM <sub>10</sub> _21 day  | -0.001        | -0.009; 0.006  | 0.73           |
| PM <sub>2.5</sub> _1 day  | -0.0006       | -0.003; 0.001  | 0.63           |
| PM <sub>2.5</sub> _2 day  | -0.002        | -0.005; 0.001  | 0.27           |
| PM <sub>2.5</sub> _7 day  | -0.003        | -0.008; 0.002  | 0.27           |
| PM <sub>2.5</sub> _14 day | -0.0001       | -0.007; 0.006  | 0.97           |
| PM <sub>2.5</sub> _21 day | -0.002        | -0.011; 0.007  | 0.66           |
| Benzene_1 day             | -0.030        | -0.092; 0.034  | 0.36           |
| Benzene_2 day             | -0.052        | -0.137; 0.031  | 0.22           |
| Benzene_7 day             | -0.12         | -0.234; -0.185 | 0.02           |
| Benzene_14 day            | -0.004        | -0.140; 0.133  | 0.95           |
| Benzene_21 day            | 0.076         | -0.083; 0.235  | 0.34           |
| NO <sub>2</sub> _1 day    | -0.001        | -0.005; 0.002  | 0.40           |
| NO <sub>2</sub> _2 day    | -0.004        | -0.009; 0.0008 | 0.10           |
| NO <sub>2</sub> _7 day    | -0.002        | -0.008; 0.005  | 0.62           |
| NO <sub>2</sub> _14 day   | 0.0004        | -0.007; 0.008  | 0.91           |
| NO <sub>2</sub> _21 day   | 0.0006        | -0.007; 0.008  | 0.87           |
| SO <sub>2</sub> _1 day    | -0.030        | -0.048; -0.013 | 0.001          |
| SO <sub>2</sub> _2 day    | -0.02         | -0.035; -0.004 | 0.01           |
| SO <sub>2</sub> _7 day    | -0.03         | -0.057; -0.014 | 0.001          |
| SO <sub>2</sub> _14 day   | 0.047         | -0.031; 0.12   | 0.23           |
| SO <sub>2</sub> _21 day   | 0.06          | 0.002; 0.12    | 0.04           |
| CO_1 day                  | 0.029         | -0.14; 0.20    | 0.74           |
| CO_2 day                  | 0.005         | -0.19; 0.21    | 0.95           |
| CO_7 day                  | 0.043         | -0.19; 0.28    | 0.72           |
| CO_14 day                 | 0.040         | -0.22; 0.30    | 0.76           |
| CO_21 day                 | -0.022        | -0.35; 0.31    | 0.89           |
| O <sub>3</sub> _1 day     | -0.002        | -0.007; 0.003  | 0.48           |
| O <sub>3</sub> _2 day     | -0.002        | -0.010; 0.006  | 0.62           |
| O <sub>3</sub> _7 day     | -0.008        | -0.020; 0.004  | 0.21           |
| O <sub>3</sub> _14 day    | -0.012        | -0.025; 0.0002 | 0.05           |
| O <sub>3</sub> _21 day    | -0.014        | -0.030; 0.002  | 0.09           |

All the associations were assessed including season, child BMI and adherence to Mediterranean diet, exposure to secondhand smoke at home, having Italian parents, having graduated mother and father in the model as potential confounders.

**Table S3.** Mean ( $\pm$  SD) and peak of concentrations of PM<sub>10</sub>, PM<sub>2.5</sub>, benzene, NO<sub>2</sub>, SO<sub>2</sub>, CO and O<sub>3</sub> measured in Brescia during the weeks before the biological sampling, in two winters (data from the local Environmental Protection Agency). All differences in pollutant concentrations and temperature in two seasons are statistically significant ( $p < 0.001$ ).

| Air pollutants and temperature              | Winter season 1<br>(Mean $\pm$ SD) | Winter season 2<br>(Mean $\pm$ SD) |
|---------------------------------------------|------------------------------------|------------------------------------|
| Temperature ( $^{\circ}$ C)                 | 5.3 $\pm$ 2.9                      | 3.1 $\pm$ 1.1                      |
| PM <sub>10</sub> ( $\mu$ g/m <sup>3</sup> ) |                                    |                                    |
| PM <sub>10</sub> _1 day                     | 41.7 $\pm$ 21.2                    | 68.1 $\pm$ 25.3                    |
| PM <sub>10</sub> _2 day                     | 38.7 $\pm$ 17.3                    | 68.1 $\pm$ 21.4                    |
| PM <sub>10</sub> _7 day                     | 41.0 $\pm$ 9.0                     | 64.4 $\pm$ 16.7                    |
| PM <sub>10</sub> _14 day                    | 41.0 $\pm$ 7.5                     | 57.8 $\pm$ 12.9                    |
| PM <sub>10</sub> _21 day                    | 41.0 $\pm$ 6.2                     | 56.2 $\pm$ 8.9                     |
| Peak PM <sub>10</sub> _7 day                | 61.8 $\pm$ 14.7                    | 85.3 $\pm$ 19.5                    |

|                                                                   |             |             |
|-------------------------------------------------------------------|-------------|-------------|
| N. of days exceeding<br>the law limits PM <sub>10</sub> _7<br>day | 2.2 ± 1.8   | 5.4 ± 2.3   |
| PM <sub>2.5</sub> (µg/m <sup>3</sup> )                            |             |             |
| PM <sub>2.5</sub> _1 day                                          | 30.5 ± 17.6 | 56.2 ± 20.9 |
| PM <sub>2.5</sub> _2 day                                          | 28.7 ± 14.8 | 56.4 ± 18.3 |
| PM <sub>2.5</sub> _7 day                                          | 31.1 ± 7.9  | 52.9 ± 14.3 |
| PM <sub>2.5</sub> _14 day                                         | 31.4 ± 6.3  | 47.5 ± 11.4 |
| PM <sub>2.5</sub> _21 day                                         | 30.5 ± 5.2  | 46.5 ± 7.6  |
| Peak PM <sub>2.5</sub> _7 day                                     | 50.7 ± 13.8 | 72.4 ± 16.6 |
| Benzene (µg/m <sup>3</sup> )                                      |             |             |
| Benzene_1 day                                                     | 1.33 ± 0.60 | 1.85 ± 1.11 |
| Benzene_2 day                                                     | 1.28 ± 0.57 | 1.86 ± 0.75 |
| Benzene_7 day                                                     | 1.38 ± 0.32 | 2.09 ± 0.71 |
| Benzene_14 day                                                    | 1.36 ± 0.28 | 1.80 ± 0.63 |
| Benzene_21 day                                                    | 1.30 ± 1.18 | 1.79 ± 0.57 |
| Peak Benzene_7 day                                                | 3.10 ± 0.52 | 5.17 ± 1.41 |
| NO <sub>2</sub> (µg/m <sup>3</sup> )                              |             |             |
| NO <sub>2</sub> _1 day                                            | 54.1 ± 11.9 | 64.6 ± 13.6 |
| NO <sub>2</sub> _2 day                                            | 52.6 ± 11.3 | 65.8 ± 9.7  |
| NO <sub>2</sub> _7 day                                            | 55.2 ± 10.5 | 66.9 ± 6.8  |

|                                      |              |              |
|--------------------------------------|--------------|--------------|
| NO <sub>2</sub> _14 day              | 55.0 ± 9.7   | 61.5 ± 5.5   |
| NO <sub>2</sub> _21 day              | 53.3 ± 9.8   | 60.3 ± 4.4   |
| Peak NO <sub>2</sub> _7 day          | 153.8 ± 30.6 | 167.8 ± 12.1 |
| SO <sub>2</sub> (µg/m <sup>3</sup> ) |              |              |
| SO <sub>2</sub> _1 day               | 2.8 ± 2.0    | 6.0 ± 2.7    |
| SO <sub>2</sub> _2 day               | 3.5 ± 2.5    | 5.4 ± 2.8    |
| SO <sub>2</sub> _7 day               | 4.21 ± 1.73  | 4.91 ± 1.60  |
| SO <sub>2</sub> _14 day              | 4.80 ± 0.48  | 4.07 ± 0.78  |
| SO <sub>2</sub> _21 day              | 4.62 ± 0.51  | 4.30 ± 0.90  |
| Peak SO <sub>2</sub> _7 day          | 11.1 ± 3.2   | 17.8 ± 8.5   |
| CO (mg/m <sup>3</sup> )              |              |              |
| CO_1 day                             | 0.96 ± 0.20  | 1.11 ± 0.36  |
| CO_2 day                             | 0.98 ± 0.21  | 1.16 ± 0.34  |
| CO_7 day                             | 0.97 ± 0.16  | 1.19 ± 0.35  |
| CO_14 day                            | 0.95 ± 0.16  | 1.07 ± 0.31  |
| CO_21 day                            | 0.93 ± 0.15  | 1.05 ± 0.21  |
| Peak CO_7 day                        | 2.3 ± 0.53   | 2.6 ± 0.61   |
| O <sub>3</sub> (µg/m <sup>3</sup> )  |              |              |
| O <sub>3</sub> _1 day                | 11.2 ± 7.2   | 10.8 ± 13.0  |
| O <sub>3</sub> _2 day                | 11.8 ± 6.2   | 7.7 ± 7.3    |
| O <sub>3</sub> _7 day                | 10.3 ± 5.2   | 6.2 ± 3.4    |

|                            |             |             |
|----------------------------|-------------|-------------|
| O <sub>3</sub> _14 day     | 11.7 ± 4.8  | 7.2 ± 3.2   |
| O <sub>3</sub> _21 day     | 14.0 ± 3.9  | 6.7 ± 1.9   |
| Peak O <sub>3</sub> _7 day | 59.9 ± 16.9 | 40.3 ± 1.51 |
|                            |             |             |
